# Supplementary material
Source: Springer Nature journal article supplement (https://www.springermedizin.de/resource/supplementary/12891_2009_766_MOESM3_ESM.pdf/9506766)

◇ Nutrient dense   ■ Energy dense   ▲ Difference   × Intake

Men:  
25-49 year old

Men:  
50+ years old

Women:  
Premenopause

Women:  
Postmenopause

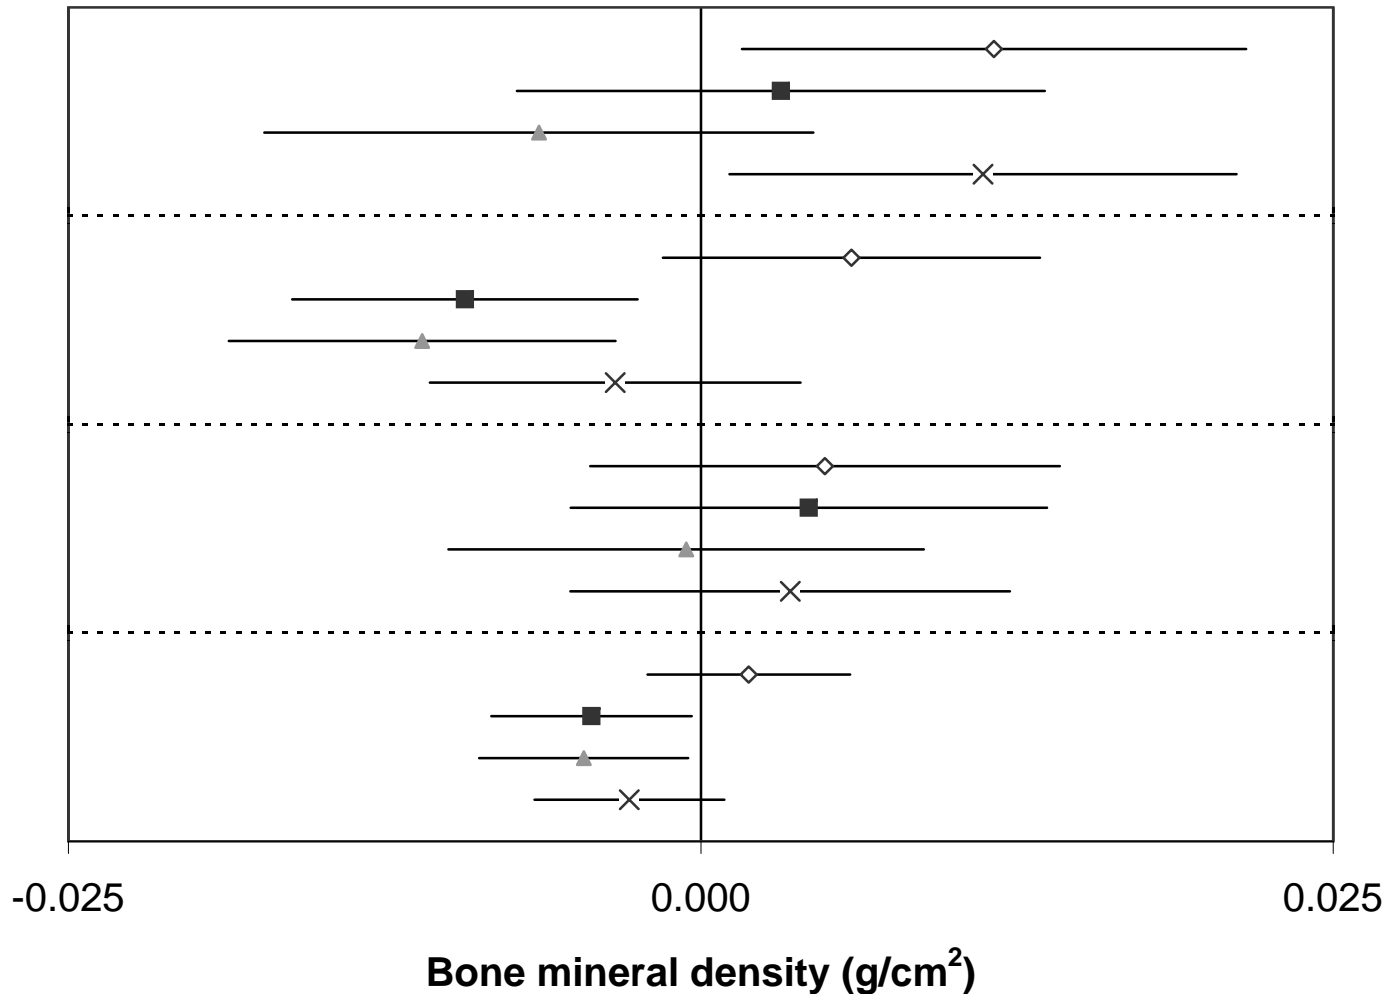

Supplement: MOESM3 [file 9506766]
